# Supplementary material for: Synthesis and Structure of Iron (II) Complexes of Functionalized 1,5-Diaza-3,7-Diphosphacyclooctanes
Source: MDPI journal article supplement (doi:10.3390/molecules25173775), 2020-08-19

# checkCIF/PLATON report

Structure factors have been supplied for datablock(s) shelx

THIS REPORT IS FOR GUIDANCE ONLY. IF USED AS PART OF A REVIEW PROCEDURE FOR PUBLICATION, IT SHOULD NOT REPLACE THE EXPERTISE OF AN EXPERIENCED CRYSTALLOGRAPHIC REFEREE.

No syntax errors found.      CIF dictionary      Interpreting this report

## Datablock: shelx

---

Bond precision:    C-C = 0.0266 Å                      Wavelength=0.71073

Cell:                      a=22.651(2)              b=22.651(2)              c=15.3431(17)  
                            alpha=90              beta=90              gamma=120  
Temperature:              100 K

|                | Calculated                                                       | Reported                                                          |
|----------------|------------------------------------------------------------------|-------------------------------------------------------------------|
| Volume         | 6817.4(14)                                                       | 6817.3(16)                                                        |
| Space group    | P 3 2 1                                                          | P 3 2 1                                                           |
| Hall group     | P 3 2"                                                           | P 3 2"                                                            |
| Moiety formula | 3(C68 H80 B F4 Fe N4 P4),<br>2(B F4), 15(C3 H6 O) [+<br>solvent] | 3(C68 H68 B F4 Fe N4 P4),<br>2(B F4), 15(C3 H6 O), [+<br>SOLVENT] |
| Sum formula    | C249 H330 B5 F20 Fe3 N12<br>O15 P12 [+ solvent]                  | C249 H294 B5 F20 Fe3 N12<br>O15 P12                               |
| Mr             | 4704.49                                                          | 4704.49                                                           |
| Dx,g cm-3      | 1.146                                                            | 1.142                                                             |
| Z              | 1                                                                | 1                                                                 |
| Mu (mm-1)      | 0.297                                                            | 0.297                                                             |
| F000           | 2491.0                                                           | 2464.0                                                            |
| F000'          | 2494.33                                                          |                                                                   |
| h,k,lmax       | 27,27,18                                                         | 27,27,18                                                          |
| Nref           | 8950[ 4832]                                                      | 8934                                                              |
| Tmin,Tmax      | 0.965,0.985                                                      | 0.468,0.746                                                       |
| Tmin'          | 0.942                                                            |                                                                   |

Correction method= # Reported T Limits: Tmin=0.468 Tmax=0.746  
AbsCorr = MULTI-SCAN

Data completeness= 1.85/1.00                      Theta(max)= 26.000

R(reflections)= 0.1040( 4109)                      wR2(reflections)= 0.2794( 8934)

S = 0.973                      Npar= 347

---

The following ALERTS were generated. Each ALERT has the format

**test-name\_ALERT\_alert-type\_alert-level.**

Click on the hyperlinks for more details of the test.

---

### ● Alert level B

RINTA01\_ALERT\_3\_B The value of Rint is greater than 0.18

Rint given 0.249

PLAT020\_ALERT\_3\_B The Value of Rint is Greater Than 0.12 ..... 0.249 Report

PLAT035\_ALERT\_1\_B \_chemical\_absolute\_configuration Info Not Given Please Do !

PLAT341\_ALERT\_3\_B Low Bond Precision on C-C Bonds ..... 0.02664 Ang.

PLAT413\_ALERT\_2\_B Short Inter XH3 .. XHn H52C ..H52C . 1.95 Ang.

2-x,1-x+y,-z = 6\_765 Check

---

### ● Alert level C

ABSTY02\_ALERT\_1\_C An \_exptl\_absorpt\_correction\_type has been given without  
a literature citation. This should be contained in the  
\_exptl\_absorpt\_process\_details field.

Absorption correction given as multi-scan

CHEMW01\_ALERT\_1\_C The difference between the given and expected weight for  
compound is greater 1 mass unit. Check that all hydrogen  
atoms have been taken into account.

PLAT026\_ALERT\_3\_C Ratio Observed / Unique Reflections (too) Low .. 46% Check

PLAT084\_ALERT\_3\_C High wR2 Value (i.e. > 0.25) ..... 0.28 Report

PLAT213\_ALERT\_2\_C Atom C30 has ADP max/min Ratio ..... 3.2 prolat

PLAT220\_ALERT\_2\_C NonSolvent Resd 1 C Ueq(max)/Ueq(min) Range 3.9 Ratio

PLAT234\_ALERT\_4\_C Large Hirshfeld Difference C33 --C34 . 0.16 Ang.

PLAT241\_ALERT\_2\_C High 'MainMol' Ueq as Compared to Neighbors of C29 Check

PLAT241\_ALERT\_2\_C High 'MainMol' Ueq as Compared to Neighbors of C30 Check

PLAT242\_ALERT\_2\_C Low 'MainMol' Ueq as Compared to Neighbors of C28 Check

PLAT242\_ALERT\_2\_C Low 'MainMol' Ueq as Compared to Neighbors of C31 Check

PLAT244\_ALERT\_4\_C Low 'Solvent' Ueq as Compared to Neighbors of B2 Check

PLAT244\_ALERT\_4\_C Low 'Solvent' Ueq as Compared to Neighbors of C60 Check

PLAT250\_ALERT\_2\_C Large U3/U1 Ratio for Average U(i,j) Tensor .... 2.2 Note

PLAT260\_ALERT\_2\_C Large Average Ueq of Residue Including O50 0.144 Check

PLAT260\_ALERT\_2\_C Large Average Ueq of Residue Including O60 0.102 Check

PLAT260\_ALERT\_2\_C Large Average Ueq of Residue Including O83A 0.164 Check

PLAT331\_ALERT\_2\_C Small Aver Phenyl C-C Dist C11 --C16 . 1.36 Ang.

PLAT905\_ALERT\_3\_C Negative K value in the Analysis of Variance ... -0.605 Report

PLAT911\_ALERT\_3\_C Missing FCF Refl Between Thmin & STh/L= 0.600 8 Report

---

### ● Alert level G

FORMU01\_ALERT\_2\_G There is a discrepancy between the atom counts in the  
\_chemical\_formula\_sum and the formula from the \_atom\_site\* data.

Atom count from \_chemical\_formula\_sum: C249 H294 B5 F20 Fe3 N12 O15 P12

Atom count from the \_atom\_site data: C249 H330 B5 F20 Fe3 N12 O15 P12

CELLZ01\_ALERT\_1\_G Difference between formula and atom\_site contents detected.

CELLZ01\_ALERT\_1\_G ALERT: Large difference may be due to a  
symmetry error - see SYMMG tests

From the CIF: \_cell\_formula\_units\_Z 1

From the CIF: \_chemical\_formula\_sum C249 H294 B5 F20 Fe3 N12 O15 P12

TEST: Compare cell contents of formula and atom\_site data

| atom | Z*formula | cif sites | diff   |
|------|-----------|-----------|--------|
| C    | 249.00    | 249.00    | 0.00   |
| H    | 294.00    | 330.00    | -36.00 |
| B    | 5.00      | 5.00      | 0.00   |
| F    | 20.00     | 20.00     | 0.00   |

|                   |                                                  |       |      |              |
|-------------------|--------------------------------------------------|-------|------|--------------|
| Fe                | 3.00                                             | 3.00  | 0.00 |              |
| N                 | 12.00                                            | 12.00 | 0.00 |              |
| O                 | 15.00                                            | 15.00 | 0.00 |              |
| P                 | 12.00                                            | 12.00 | 0.00 |              |
| PLAT002_ALERT_2_G | Number of Distance or Angle Restraints on AtSite |       |      | 8 Note       |
| PLAT041_ALERT_1_G | Calc. and Reported SumFormula Strings Differ     |       |      | Please Check |
| PLAT042_ALERT_1_G | Calc. and Reported MoietyFormula Strings Differ  |       |      | Please Check |
| PLAT068_ALERT_1_G | Reported F000 Differs from Calcd (or Missing)... |       |      | Please Check |
| PLAT072_ALERT_2_G | SHELXL First Parameter in WGHT Unusually Large   |       |      | 0.13 Report  |
| PLAT152_ALERT_1_G | The Supplied and Calc. Volume s.u. Differ by ... |       |      | -2 Units     |
| PLAT171_ALERT_4_G | The CIF-Embedded .res File Contains EADP Records |       |      | 10 Report    |
| PLAT172_ALERT_4_G | The CIF-Embedded .res File Contains DFIX Records |       |      | 4 Report     |
| PLAT173_ALERT_4_G | The CIF-Embedded .res File Contains DANG Records |       |      | 2 Report     |
| PLAT380_ALERT_4_G | Incorrectly? Oriented X(sp2)-Methyl Moiety ..... |       |      | C52 Check    |
| PLAT380_ALERT_4_G | Incorrectly? Oriented X(sp2)-Methyl Moiety ..... |       |      | C82 Check    |
| PLAT606_ALERT_4_G | Solvent Accessible VOID(S) in Structure .....    |       |      | ! Info       |
| PLAT790_ALERT_4_G | Centre of Gravity not Within Unit Cell: Resd. #  |       |      | 3 Note       |
|                   | C3 H6 O                                          |       |      |              |
| PLAT790_ALERT_4_G | Centre of Gravity not Within Unit Cell: Resd. #  |       |      | 4 Note       |
|                   | C3 H6 O                                          |       |      |              |
| PLAT791_ALERT_4_G | Model has Chirality at C9 (Sohnke SpGr)          |       |      | R Verify     |
| PLAT791_ALERT_4_G | Model has Chirality at C24 (Sohnke SpGr)         |       |      | R Verify     |
| PLAT802_ALERT_4_G | CIF Input Record(s) with more than 80 Characters |       |      | 1 Info       |
| PLAT860_ALERT_3_G | Number of Least-Squares Restraints .....         |       |      | 6 Note       |
| PLAT869_ALERT_4_G | ALERTS Related to the Use of SQUEEZE Suppressed  |       |      | ! Info       |
| PLAT883_ALERT_1_G | No Info/Value for _atom_sites_solution_primary . |       |      | Please Do !  |
| PLAT910_ALERT_3_G | Missing # of FCF Reflection(s) Below Theta(Min). |       |      | 2 Note       |
| PLAT913_ALERT_3_G | Missing # of Very Strong Reflections in FCF .... |       |      | 2 Note       |
| PLAT933_ALERT_2_G | Number of OMIT Records in Embedded .res File ... |       |      | 12 Note      |
| PLAT978_ALERT_2_G | Number C-C Bonds with Positive Residual Density. |       |      | 0 Info       |

---

0 **ALERT level A** = Most likely a serious problem - resolve or explain  
 5 **ALERT level B** = A potentially serious problem, consider carefully  
 20 **ALERT level C** = Check. Ensure it is not caused by an omission or oversight  
 27 **ALERT level G** = General information/check it is not something unexpected

10 ALERT type 1 CIF construction/syntax error, inconsistent or missing data  
 17 ALERT type 2 Indicator that the structure model may be wrong or deficient  
 10 ALERT type 3 Indicator that the structure quality may be low  
 15 ALERT type 4 Improvement, methodology, query or suggestion  
 0 ALERT type 5 Informative message, check

---

It is advisable to attempt to resolve as many as possible of the alerts in all categories. Often the minor alerts point to easily fixed oversights, errors and omissions in your CIF or refinement strategy, so attention to these fine details can be worthwhile. In order to resolve some of the more serious problems it may be necessary to carry out additional measurements or structure refinements. However, the purpose of your study may justify the reported deviations and the more serious of these should normally be commented upon in the discussion or experimental section of a paper or in the "special\_details" fields of the CIF. checkCIF was carefully designed to identify outliers and unusual parameters, but every test has its limitations and alerts that are not important in a particular case may appear. Conversely, the absence of alerts does not guarantee there are no aspects of the results needing attention. It is up to the individual to critically assess their own results and, if necessary, seek expert advice.

### **Publication of your CIF in IUCr journals**

A basic structural check has been run on your CIF. These basic checks will be run on all CIFs submitted for publication in IUCr journals (*Acta Crystallographica*, *Journal of Applied Crystallography*, *Journal of Synchrotron Radiation*); however, if you intend to submit to *Acta Crystallographica Section C* or *E* or *IUCrData*, you should make sure that full publication checks are run on the final version of your CIF prior to submission.

### **Publication of your CIF in other journals**

Please refer to the *Notes for Authors* of the relevant journal for any special instructions relating to CIF submission.

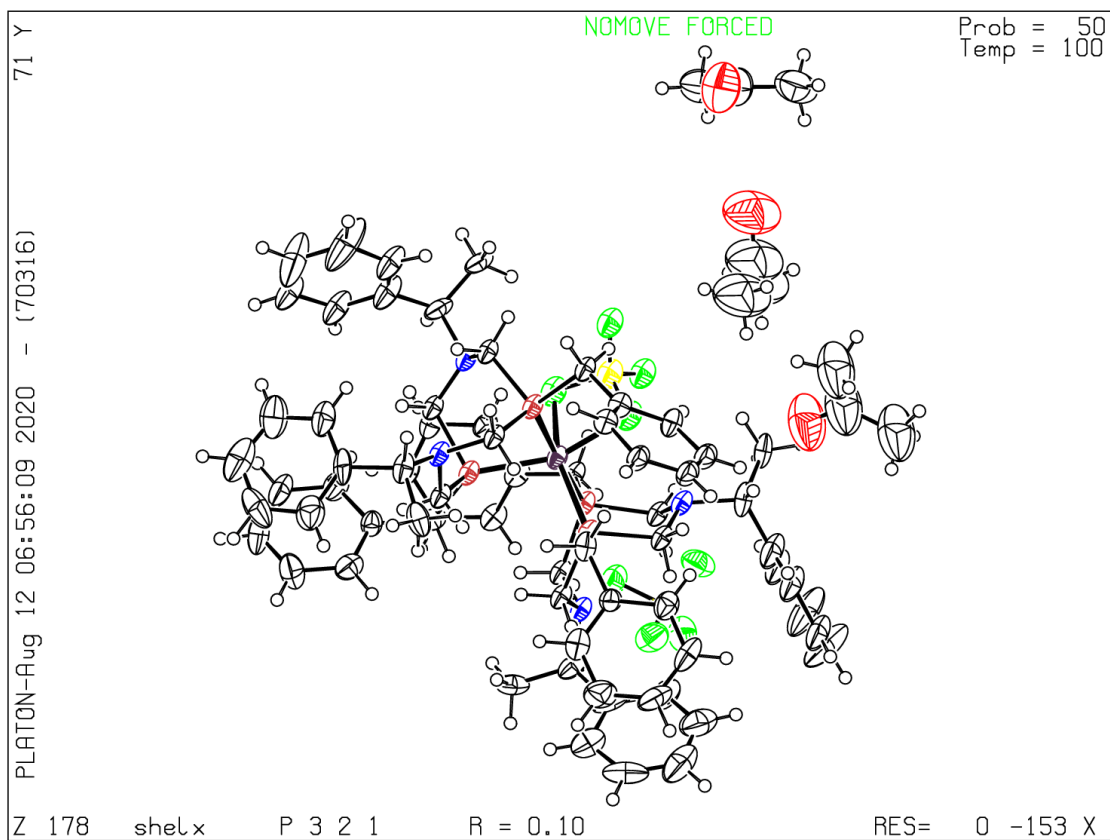

Supplement: s1 [file s1]
