# Supplementary material for: Synthesis and Structure of Iron (II) Complexes of Functionalized 1,5-Diaza-3,7-Diphosphacyclooctanes
Source: MDPI journal article supplement (doi:10.3390/molecules25173775), 2020-08-19

# checkCIF/PLATON report

Structure factors have been supplied for datablock(s) I

THIS REPORT IS FOR GUIDANCE ONLY. IF USED AS PART OF A REVIEW PROCEDURE FOR PUBLICATION, IT SHOULD NOT REPLACE THE EXPERTISE OF AN EXPERIENCED CRYSTALLOGRAPHIC REFEREE.

No syntax errors found.      CIF dictionary      Interpreting this report

## Datablock: I

---

|                        |                                       |                                       |             |
|------------------------|---------------------------------------|---------------------------------------|-------------|
| Bond precision:        | C-C = 0.0232 Å                        | Wavelength=0.71073                    |             |
| Cell:                  | a=13.7178(14)                         | b=20.452(2)                           | c=27.659(3) |
|                        | alpha=90                              | beta=90                               | gamma=90    |
| Temperature:           | 100 K                                 |                                       |             |
|                        | Calculated                            | Reported                              |             |
| Volume                 | 7759.9(14)                            | 7759.8(14)                            |             |
| Space group            | P 21 21 21                            | P 21 21 21                            |             |
| Hall group             | P 2ac 2ab                             | P 2ac 2ab                             |             |
| Moiety formula         | C72 H86 Fe N6 P4, 2(B F4), 2(C2 H3 N) | C72 H86 Fe N6 P4, 2(B F4), 2(C2 H3 N) |             |
| Sum formula            | C76 H92 B2 F8 Fe N8 P4                | C76 H92 B2 F8 Fe N8 P4                |             |
| Mr                     | 1470.93                               | 1470.92                               |             |
| Dx, g cm <sup>-3</sup> | 1.259                                 | 1.259                                 |             |
| Z                      | 4                                     | 4                                     |             |
| Mu (mm <sup>-1</sup> ) | 0.342                                 | 0.342                                 |             |
| F000                   | 3088.0                                | 3088.0                                |             |
| F000'                  | 3092.27                               |                                       |             |
| h,k,lmax               | 16,25,33                              | 16,24,33                              |             |
| Nref                   | 14986[ 8195]                          | 14690                                 |             |
| Tmin,Tmax              | 0.960,0.983                           | 0.619,0.746                           |             |
| Tmin'                  | 0.934                                 |                                       |             |

Correction method= # Reported T Limits: Tmin=0.619 Tmax=0.746  
AbsCorr = MULTI-SCAN

Data completeness= 1.79/0.98      Theta(max)= 25.842

R(reflections)= 0.0791( 7289)      wR2(reflections)= 0.2081( 14690)

S = 1.007      Npar= 866

---

The following ALERTS were generated. Each ALERT has the format

**test-name\_ALERT\_alert-type\_alert-level.**

Click on the hyperlinks for more details of the test.

---

**Alert level B**

RINTA01\_ALERT\_3\_B The value of Rint is greater than 0.18

Rint given 0.197

PLAT020\_ALERT\_3\_B The Value of Rint is Greater Than 0.12 ..... 0.197 Report

PLAT341\_ALERT\_3\_B Low Bond Precision on C-C Bonds ..... 0.02317 Ang.

PLAT910\_ALERT\_3\_B Missing # of FCF Reflection(s) Below Theta(Min). 15 Note

---

**Alert level C**

ABSTY02\_ALERT\_1\_C An \_exptl\_absorpt\_correction\_type has been given without  
a literature citation. This should be contained in the  
\_exptl\_absorpt\_process\_details field.

Absorption correction given as multi-scan

PLAT213\_ALERT\_2\_C Atom C13 has ADP max/min Ratio ..... 3.1 prolat

PLAT220\_ALERT\_2\_C NonSolvent Resd 1 C Ueq(max) / Ueq(min) Range 4.6 Ratio

PLAT222\_ALERT\_3\_C NonSolvent Resd 1 H Uiso(max)/Uiso(min) Range 4.6 Ratio

PLAT234\_ALERT\_4\_C Large Hirshfeld Difference C33B --C34B . 0.18 Ang.

PLAT234\_ALERT\_4\_C Large Hirshfeld Difference C36 --C37 . 0.19 Ang.

PLAT241\_ALERT\_2\_C High 'MainMol' Ueq as Compared to Neighbors of C13 Check

PLAT241\_ALERT\_2\_C High 'MainMol' Ueq as Compared to Neighbors of C13B Check

PLAT241\_ALERT\_2\_C High 'MainMol' Ueq as Compared to Neighbors of C26B Check

PLAT241\_ALERT\_2\_C High 'MainMol' Ueq as Compared to Neighbors of C29 Check

PLAT241\_ALERT\_2\_C High 'MainMol' Ueq as Compared to Neighbors of C36B Check

PLAT242\_ALERT\_2\_C Low 'MainMol' Ueq as Compared to Neighbors of C18B Check

PLAT242\_ALERT\_2\_C Low 'MainMol' Ueq as Compared to Neighbors of C24B Check

PLAT242\_ALERT\_2\_C Low 'MainMol' Ueq as Compared to Neighbors of C33B Check

PLAT242\_ALERT\_2\_C Low 'MainMol' Ueq as Compared to Neighbors of C41 Check

PLAT244\_ALERT\_4\_C Low 'Solvent' Ueq as Compared to Neighbors of C51 Check

PLAT244\_ALERT\_4\_C Low 'Solvent' Ueq as Compared to Neighbors of C61 Check

PLAT260\_ALERT\_2\_C Large Average Ueq of Residue Including F1 0.211 Check

PLAT260\_ALERT\_2\_C Large Average Ueq of Residue Including F5 0.265 Check

PLAT260\_ALERT\_2\_C Large Average Ueq of Residue Including N50 0.162 Check

PLAT260\_ALERT\_2\_C Large Average Ueq of Residue Including N60 0.182 Check

PLAT332\_ALERT\_2\_C Large Phenyl C-C Range C26B -C31B . 0.20 Ang.

PLAT601\_ALERT\_2\_C Structure Contains Solvent Accessible VOIDS of . 37 Ang\*\*3

PLAT761\_ALERT\_1\_C CIF Contains no X-H Bonds ..... Please Check

PLAT762\_ALERT\_1\_C CIF Contains no X-Y-H or H-Y-H Angles ..... Please Check

PLAT911\_ALERT\_3\_C Missing FCF Refl Between Thmin & STh/L= 0.600 2 Report

---

**Alert level G**

PLAT002\_ALERT\_2\_G Number of Distance or Angle Restraints on AtSite 5 Note

PLAT083\_ALERT\_2\_G SHELXL Second Parameter in WGHT Unusually Large 10.32 Why ?

PLAT171\_ALERT\_4\_G The CIF-Embedded .res File Contains EADP Records 1 Report

PLAT172\_ALERT\_4\_G The CIF-Embedded .res File Contains DFIX Records 4 Report

PLAT244\_ALERT\_4\_G Low 'Solvent' Ueq as Compared to Neighbors of B1 Check

PLAT244\_ALERT\_4\_G Low 'Solvent' Ueq as Compared to Neighbors of B2 Check

PLAT720\_ALERT\_4\_G Number of Unusual/Non-Standard Labels ..... 8 Note

PLAT790\_ALERT\_4\_G Centre of Gravity not Within Unit Cell: Resd. #  
C2 H3 N 5 Note

PLAT791\_ALERT\_4\_G Model has Chirality at P3B (Sohnke SpGr) R Verify

PLAT791\_ALERT\_4\_G Model has Chirality at P7B (Sohnke SpGr) S Verify

PLAT791\_ALERT\_4\_G Model has Chirality at C9 (Sohnke SpGr) R Verify

PLAT791\_ALERT\_4\_G Model has Chirality at C9B (Sohnke SpGr) R Verify

PLAT791\_ALERT\_4\_G Model has Chirality at C24 (Sohnke SpGr) R Verify

PLAT791\_ALERT\_4\_G Model has Chirality at C24B (Sohnke SpGr) R Verify

|                   |                                                  |    |             |
|-------------------|--------------------------------------------------|----|-------------|
| PLAT802_ALERT_4_G | CIF Input Record(s) with more than 80 Characters | 1  | Info        |
| PLAT860_ALERT_3_G | Number of Least-Squares Restraints .....         | 4  | Note        |
| PLAT883_ALERT_1_G | No Info/Value for _atom_sites_solution_primary . |    | Please Do ! |
| PLAT912_ALERT_4_G | Missing # of FCF Reflections Above STh/L= 0.600  | 92 | Note        |
| PLAT933_ALERT_2_G | Number of OMIT Records in Embedded .res File ... | 17 | Note        |
| PLAT978_ALERT_2_G | Number C-C Bonds with Positive Residual Density. | 0  | Info        |

---

0 **ALERT level A** = Most likely a serious problem - resolve or explain  
 4 **ALERT level B** = A potentially serious problem, consider carefully  
 26 **ALERT level C** = Check. Ensure it is not caused by an omission or oversight  
 20 **ALERT level G** = General information/check it is not something unexpected

4 ALERT type 1 CIF construction/syntax error, inconsistent or missing data  
 21 ALERT type 2 Indicator that the structure model may be wrong or deficient  
 7 ALERT type 3 Indicator that the structure quality may be low  
 18 ALERT type 4 Improvement, methodology, query or suggestion  
 0 ALERT type 5 Informative message, check

---

## checkCIF publication errors

---

### Alert level A

PUBL004\_ALERT\_1\_A The contact author's name and address are missing,  
     \_publ\_contact\_author\_name and \_publ\_contact\_author\_address.  
 PUBL005\_ALERT\_1\_A \_publ\_contact\_author\_email, \_publ\_contact\_author\_fax and  
     \_publ\_contact\_author\_phone are all missing.  
     At least one of these should be present.  
 PUBL006\_ALERT\_1\_A \_publ\_requested\_journal is missing  
     e.g. 'Acta Crystallographica Section C'  
 PUBL008\_ALERT\_1\_A \_publ\_section\_title is missing. Title of paper.  
 PUBL012\_ALERT\_1\_A \_publ\_section\_abstract is missing.  
     Abstract of paper in English.

---

### Alert level G

PUBL017\_ALERT\_1\_G The \_publ\_section\_references section is missing or  
     empty.

---

5 **ALERT level A** = Data missing that is essential or data in wrong format  
 1 **ALERT level G** = General alerts. Data that may be required is missing

---

## Publication of your CIF

You should attempt to resolve as many as possible of the alerts in all categories. Often the minor alerts point to easily fixed oversights, errors and omissions in your CIF or refinement strategy, so attention to these fine details can be worthwhile. In order to resolve some of the more serious problems it may be necessary to carry out additional measurements or structure refinements. However, the nature of your study may justify the reported deviations from journal submission requirements and the more serious of these should be commented upon in the discussion or experimental section of a paper or in the "special\_details" fields of the CIF. *checkCIF* was carefully designed to identify outliers and unusual parameters, but every test has its limitations and alerts that are not important in a particular case may appear. Conversely, the absence of alerts does not guarantee there are no aspects of the results needing attention. It is up to the individual to critically assess their own results and, if necessary, seek expert advice.

If level A alerts remain, which you believe to be justified deviations, and you intend to submit this CIF for publication in a journal, you should additionally insert an explanation in your CIF using the Validation Reply Form (VRF) below. This will allow your explanation to be considered as part of the review process.

## Validation response form

Please find below a validation response form (VRF) that can be filled in and pasted into your CIF.

```
# start Validation Reply Form
_vrf_PUBL004_GLOBAL
;
PROBLEM: The contact author's name and address are missing,
RESPONSE: ...
;
_vrf_PUBL005_GLOBAL
;
PROBLEM: _publ_contact_author_email, _publ_contact_author_fax and
RESPONSE: ...
;
_vrf_PUBL006_GLOBAL
;
PROBLEM: _publ_requested_journal is missing
RESPONSE: ...
;
_vrf_PUBL008_GLOBAL
;
PROBLEM: _publ_section_title is missing. Title of paper.
RESPONSE: ...
;
_vrf_PUBL012_GLOBAL
;
PROBLEM: _publ_section_abstract is missing.
RESPONSE: ...
;
# end Validation Reply Form
```

If you wish to submit your CIF for publication in Acta Crystallographica Section C or E, you should upload your CIF via the web. If you wish to submit your CIF for publication in IUCrData you should upload your CIF via the web. If your CIF is to form part of a submission to another IUCr journal, you will be asked, either during electronic submission or by the Co-editor handling your paper, to upload your CIF via our web site.

---

**PLATON version of 22/04/2020; check.def file version of 09/03/2020**

Datablock I - ellipsoid plot

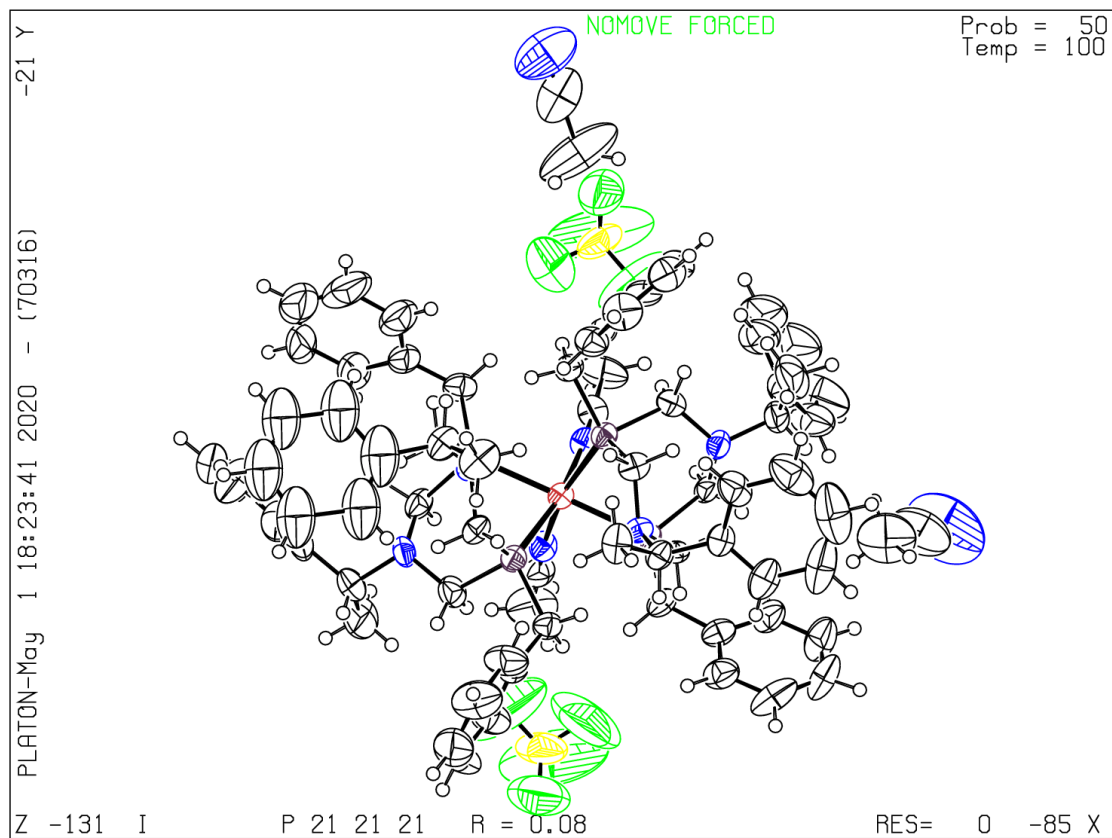

Supplement: s1 [file s1]
